# Supplementary material for: Complex structural rearrangements are present in high-grade dysplastic Barrett’s oesophagus samples
Source: PubMed Central journal article supplement (PMC6360790; doi:10.1186/s12920-019-0476-9), 2019-02-04
Supplement: 12920_2019_476_MOESM3_ESM.pdf [file 12920_2019_476_MOESM3_ESM.pdf]

## Previously reported driver or recurrently mutated genes in EAC

ACTL7B  
ABCB1  
ABGL4  
AJAP1  
AKAP6  
ARID1A  
ARID2  
C6orf118  
CCDC102B  
CCNE1  
CCND1  
CCSER1  
CDH18  
CDK12  
CDK14  
CDKN2A  
CNTNAP5  
CTNNA2  
CTNNA3  
CYP7B1  
DOCK2  
EGFR  
ELMO1  
ERBB2  
ERBB4  
EYS  
F5  
FHIT  
FRS2  
GATA4  
GATA6  
HECW1  
IMMP2L  
IGFR1  
JUP  
KAT6A  
KCNQ3  
KCMU1  
KIP26B  
KRAS  
MTMR9  
MECOM  
MYC  
MYO18B  
MACROD2

MDM2  
NAALADL2  
NUAK1  
PARK2  
PARKD3B  
PIK3CA  
PDE4D  
PRKG1  
PBRM1  
RB1  
RBFOX1  
RUNX1  
SCN10A  
SLC39A12  
SMAD4  
SMARCA4  
SMYD3  
SAMD5  
SASH1  
SOX5  
SPG20  
SYNE1  
THADA  
TLL1  
TLR4  
TP53  
VEGFA  
WWOX
